# Supplementary material for: RIC-3 expression and splicing regulate nAChR functional expression
Source: PubMed Central journal article supplement (PMC4850696; doi:10.1186/s13041-016-0231-5), 2016-04-29

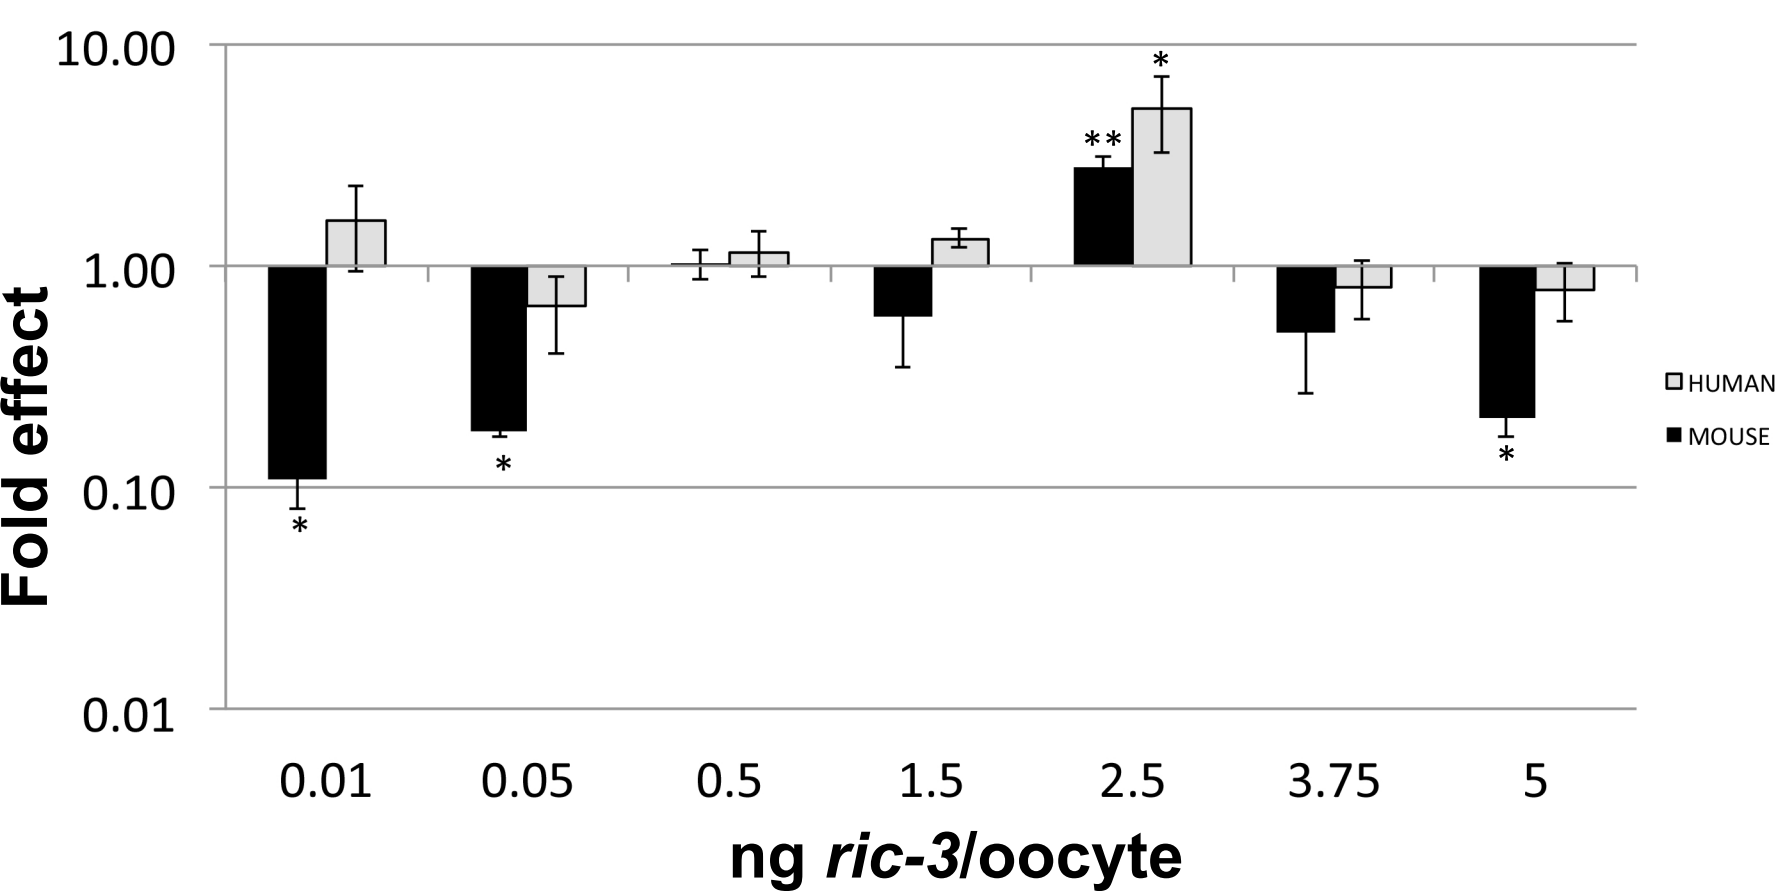

Supplement: 13041_2016_231_MOESM2_ESM.pdf [file 13041_2016_231_MOESM2_ESM.pdf]
